# Supplementary material for: Improvement of the chemical and physical gas adsorption ability of poly(3-hexylthiophene) thin films by ultraviolet-ozone exposure
Source: Royal Society of Chemistry journal article supplement (doi:10.1039/d5tc00053j), 2025-01-01
Supplement: d5tc00053j1.pdf [file d5tc00053j1.pdf]

## Supporting Information

### **Improvement of the chemical and physical gas adsorption ability of poly(3-hexylthiophene) thin films by ultraviolet-ozone exposure**

*Nahyeon Gu<sup>a</sup>, and Yeong Don Park<sup>\*ab</sup>*

*a. Department of Energy and Chemical Engineering, Incheon National University, Incheon 22012, Republic of Korea.*

*E-mail: gunah1@inu.ac.kr, ydpark@inu.ac.kr*

*b. Innovation Center for Chemical Engineering, Incheon National University, Incheon 22012, Republic of Korea.*

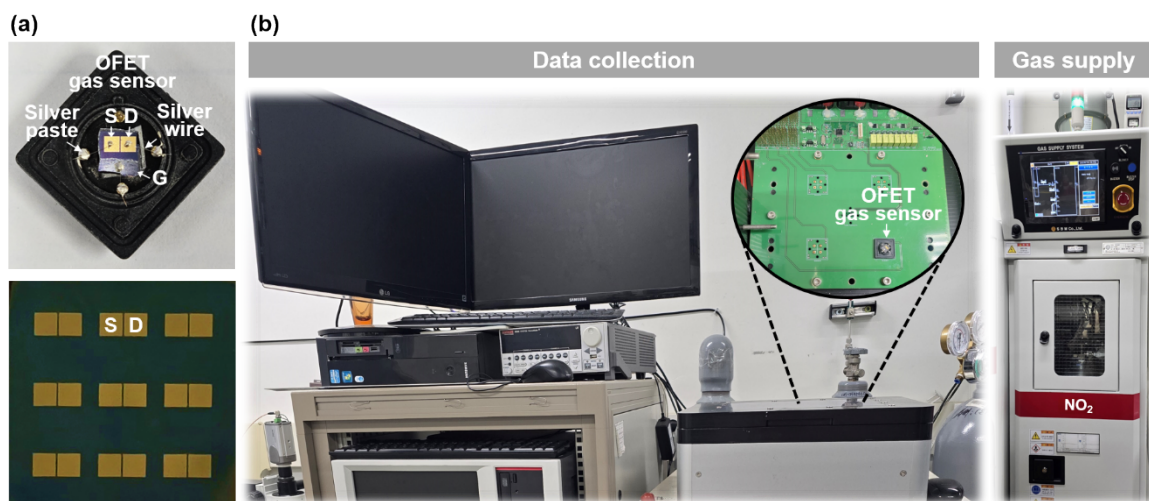

**Figure S1.** (a) Photograph of the OTET type gas sensor, (b) Photograph of the gas sensor performance test system.
